# Supplementary material for: Hematologic changes after short term hypoxia in non-elite apnea divers under voluntary dry apnea conditions
Source: PubMed Central journal article supplement (PMC7425904; doi:10.1371/journal.pone.0237673), 2020-08-13
Supplement: pone.0237673.s001.pdf [file pone.0237673.s001.pdf]

|                 | <b>Baseline</b> | <b>Post apnea</b> | <b>30min post apnea</b> | <b>4 h post apnea</b> |
|-----------------|-----------------|-------------------|-------------------------|-----------------------|
| Basophile %     | 0.60            | 0.50              | 0.50                    | 0.50                  |
|                 | 1.30            | 1.20              | 1.40                    | 0.90                  |
|                 | 0.60            | 0.50              | 0.50                    | 0.40                  |
|                 | 0.50            | 0.40              | 0.60                    | 0.40                  |
|                 | 1.00            | 1.10              | 0.60                    | 0.40                  |
|                 | 0.20            | 0.20              | 0.30                    | 0.30                  |
|                 | 0.40            | 0.20              | 0.20                    | 0.10                  |
|                 | 2.00            | 1.40              | 1.90                    | 1.40                  |
|                 | 0.50            | 0.50              | 0.60                    | 0.80                  |
|                 | 0.90            | 0.80              | 0.90                    | 0.80                  |
| Basophile abs   | 0.03            | 0.04              | 0.03                    | 0.05                  |
|                 | 0.07            | 0.10              | 0.07                    | 0.06                  |
|                 | 0.03            | 0.03              | 0.02                    | 0.02                  |
|                 | 0.03            | 0.03              | 0.03                    | 0.02                  |
|                 | 0.04            | 0.05              | 0.02                    | 0.02                  |
|                 | 0.01            | 0.01              | 0.01                    | 0.02                  |
|                 | 0.02            | 0.01              | 0.01                    | 0.01                  |
|                 | 0.11            | 0.12              | 0.08                    | 0.09                  |
|                 | 0.04            | 0.05              | 0.04                    | 0.07                  |
|                 | 0.07            | 0.07              | 0.05                    | 0.06                  |
| Eosinophile %   | 2.20            | 1.40              | 0.60                    | 0.70                  |
|                 | 6.10            | 3.60              | 4.60                    | 2.60                  |
|                 | 2.80            | 1.90              | 1.90                    | 1.90                  |
|                 | 1.80            | 1.30              | 1.30                    | 1.50                  |
|                 | 4.90            | 3.40              | 3.60                    | 1.80                  |
|                 | 2.00            | 1.70              | 1.80                    | 0.90                  |
|                 | 2.60            | 1.40              | 1.00                    | 0.80                  |
|                 | 7.30            | 5.00              | 8.20                    | 5.90                  |
|                 | 1.40            | 1.60              | 1.70                    | 2.50                  |
|                 | 1.40            | 1.30              | 1.40                    | 1.50                  |
| Eosinophile abs | 0.12            | 0.12              | 0.04                    | 0.07                  |
|                 | 0.32            | 0.30              | 0.23                    | 0.17                  |
|                 | 0.13            | 0.12              | 0.08                    | 0.10                  |
|                 | 0.11            | 0.10              | 0.06                    | 0.08                  |
|                 | 0.19            | 0.16              | 0.12                    | 0.09                  |
|                 | 0.09            | 0.11              | 0.07                    | 0.06                  |
|                 | 0.12            | 0.07              | 0.06                    | 0.06                  |
|                 | 0.40            | 0.43              | 0.34                    | 0.37                  |
|                 | 0.11            | 0.15              | 0.11                    | 0.22                  |
|                 | 0.11            | 0.12              | 0.08                    | 0.11                  |

|              |      |      |      |      |
|--------------|------|------|------|------|
| Erythrocytes | 4.70 | 4.80 | 4.70 | 4.60 |
|              | 5.00 | 5.20 | 5.00 | 5.00 |
|              | 5.40 | 5.10 | 5.00 | 4.90 |
|              | 4.30 | 4.40 | 4.20 | 4.30 |
|              | 4.10 | 4.30 | 4.10 | 4.10 |
|              | 5.10 | 5.40 | 5.10 | 5.50 |
|              | 5.20 | 5.10 | 4.90 | 5.20 |
|              | 4.60 | 4.50 | 4.30 | 4.50 |
|              | 4.70 | 4.40 | 4.30 | 4.50 |
|              | 4.20 | 4.20 | 4.10 | 4.10 |

|     |       |       |       |       |
|-----|-------|-------|-------|-------|
| RDW | 11.10 | 11.00 | 11.00 | 11.10 |
|     | 12.60 | 12.60 | 12.60 | 12.60 |
|     | 13.10 | 13.00 | 12.90 | 13.00 |
|     | 11.90 | 11.70 | 11.90 | 11.90 |
|     | 12.80 | 12.70 | 12.80 | 12.90 |
|     | 12.00 | 12.00 | 12.00 | 11.90 |
|     | 12.10 | 12.00 | 12.10 | 12.20 |
|     | 12.00 | 11.90 | 11.90 | 12.00 |
|     | 12.90 | 12.80 | 12.70 | 12.90 |
|     | 12.00 | 12.00 | 11.90 | 12.10 |

|            |    |    |    |    |
|------------|----|----|----|----|
| Hematocrit | 41 | 41 | 40 | 40 |
|            | 43 | 44 | 42 | 42 |
|            | 43 | 40 | 39 | 38 |
|            | 40 | 40 | 38 | 39 |
|            | 38 | 38 | 37 | 37 |
|            | 43 | 45 | 42 | 46 |
|            | 45 | 44 | 43 | 45 |
|            | 40 | 39 | 37 | 39 |
|            | 39 | 36 | 35 | 37 |
|            | 37 | 36 | 36 | 37 |

|            |       |       |       |       |
|------------|-------|-------|-------|-------|
| Hemoglobin | 14.60 | 15.20 | 14.70 | 14.70 |
|            | 15.30 | 15.50 | 14.90 | 15.00 |
|            | 14.30 | 13.40 | 13.20 | 13.10 |
|            | 14.30 | 14.50 | 13.70 | 14.00 |
|            | 12.90 | 13.60 | 13.10 | 13.00 |
|            | 15.60 | 16.60 | 15.40 | 16.80 |
|            | 15.70 | 15.30 | 15.10 | 15.80 |
|            | 14.40 | 14.20 | 13.50 | 14.10 |
|            | 13.00 | 12.40 | 12.20 | 12.50 |
|            | 13.00 | 12.90 | 12.50 | 12.70 |

|                         |      |      |      |      |
|-------------------------|------|------|------|------|
| Immature Granulocytes % | 0.20 | 0.20 | 0.50 | 0.30 |
|                         | 0.40 | 0.40 | 0.40 | 0.30 |
|                         | 0.40 | 0.20 | 0.50 | 0.20 |
|                         | 0.30 | 0.30 | 0.20 | 0.20 |
|                         | 0.30 | 0.20 | 0.00 | 0.00 |
|                         | 0.20 | 0.30 | 0.00 | 0.10 |
|                         | 0.20 | 0.20 | 0.20 | 0.10 |
|                         | 0.50 | 0.20 | 0.50 | 0.20 |
|                         | 0.30 | 0.30 | 0.30 | 0.10 |
|                         | 0.30 | 0.20 | 0.20 | 0.10 |

|                           |      |      |      |      |
|---------------------------|------|------|------|------|
| Immature Granulocytes abs | 0.01 | 0.02 | 0.03 | 0.03 |
|                           | 0.02 | 0.03 | 0.02 | 0.02 |
|                           | 0.02 | 0.01 | 0.02 | 0.01 |
|                           | 0.02 | 0.02 | 0.01 | 0.01 |
|                           | 0.01 | 0.01 | 0.00 | 0.00 |
|                           | 0.01 | 0.02 | 0.00 | 0.01 |
|                           | 0.01 | 0.01 | 0.01 | 0.01 |
|                           | 0.03 | 0.02 | 0.02 | 0.01 |
|                           | 0.02 | 0.03 | 0.02 | 0.01 |
|                           | 0.02 | 0.02 | 0.01 | 0.01 |

|                        |      |      |      |      |
|------------------------|------|------|------|------|
| Immature Reticulocytes | 3.20 | 4.50 | 3.90 | 4.00 |
|                        | 8.30 | 7.80 | 6.70 | 6.90 |
|                        | 5.10 | 5.10 | 6.70 | 3.50 |
|                        | 5.60 | 6.50 | 6.70 | 5.70 |
|                        | 5.10 | 3.50 | 3.20 | 3.10 |
|                        | 6.60 | 7.00 | 5.40 | 5.80 |
|                        | 4.20 | 3.90 | 4.00 | 3.10 |
|                        | 6.90 | 5.50 | 7.70 | 4.60 |
|                        | 3.50 | 3.30 | 2.40 | 0.90 |
|                        | 7.20 | 8.60 | 9.20 | 7.80 |

|                         |      |      |      |      |
|-------------------------|------|------|------|------|
| Immature Granulocytes % | 0.20 | 0.20 | 0.50 | 0.30 |
|                         | 0.40 | 0.40 | 0.40 | 0.30 |
|                         | 0.40 | 0.20 | 0.50 | 0.20 |
|                         | 0.30 | 0.30 | 0.20 | 0.20 |
|                         | 0.30 | 0.20 | 0.00 | 0.00 |
|                         | 0.20 | 0.30 | 0.00 | 0.10 |
|                         | 0.20 | 0.20 | 0.20 | 0.10 |
|                         | 0.50 | 0.20 | 0.50 | 0.20 |
|                         | 0.30 | 0.30 | 0.30 | 0.10 |
|                         | 0.30 | 0.20 | 0.20 | 0.10 |

|                           |       |       |       |       |
|---------------------------|-------|-------|-------|-------|
| Immature Granulocytes abs | 0.01  | 0.02  | 0.03  | 0.03  |
|                           | 0.02  | 0.03  | 0.02  | 0.02  |
|                           | 0.02  | 0.01  | 0.02  | 0.01  |
|                           | 0.02  | 0.02  | 0.01  | 0.01  |
|                           | 0.01  | 0.01  | 0.00  | 0.00  |
|                           | 0.01  | 0.02  | 0.00  | 0.01  |
|                           | 0.01  | 0.01  | 0.01  | 0.01  |
|                           | 0.03  | 0.02  | 0.02  | 0.01  |
|                           | 0.02  | 0.03  | 0.02  | 0.01  |
|                           | 0.02  | 0.02  | 0.01  | 0.01  |
| Leucocytes                | 5.39  | 8.58  | 6.64  | 10.42 |
|                           | 5.24  | 8.39  | 4.97  | 6.60  |
|                           | 4.66  | 6.34  | 4.20  | 5.19  |
|                           | 6.03  | 7.53  | 4.64  | 5.31  |
|                           | 3.89  | 4.75  | 3.37  | 5.11  |
|                           | 4.40  | 6.63  | 3.86  | 6.94  |
|                           | 4.67  | 4.92  | 5.79  | 7.53  |
|                           | 5.47  | 8.68  | 4.16  | 6.23  |
|                           | 7.71  | 9.64  | 6.52  | 8.66  |
|                           | 7.67  | 9.01  | 5.80  | 7.18  |
| Lymphocytes %             | 43.80 | 42.80 | 21.80 | 25.10 |
|                           | 38.00 | 48.60 | 33.00 | 32.30 |
|                           | 36.90 | 44.20 | 34.80 | 32.20 |
|                           | 41.80 | 49.00 | 42.00 | 46.50 |
|                           | 40.90 | 38.90 | 34.10 | 24.70 |
|                           | 29.50 | 39.40 | 25.60 | 22.50 |
|                           | 39.60 | 40.00 | 16.80 | 17.30 |
|                           | 32.40 | 47.60 | 27.60 | 27.10 |
|                           | 30.50 | 38.60 | 34.20 | 34.30 |
|                           | 48.40 | 52.30 | 44.80 | 52.40 |
| Lymphocytes abs           | 2.36  | 3.67  | 1.45  | 2.62  |
|                           | 1.99  | 4.08  | 1.64  | 2.13  |
|                           | 1.72  | 2.80  | 1.46  | 1.67  |
|                           | 2.52  | 3.69  | 1.95  | 2.47  |
|                           | 1.59  | 1.85  | 1.15  | 1.26  |
|                           | 1.30  | 2.61  | 0.99  | 1.56  |
|                           | 1.85  | 1.97  | 0.97  | 1.30  |
|                           | 1.77  | 4.13  | 1.15  | 1.69  |
|                           | 2.35  | 3.72  | 2.23  | 2.97  |

|             | 3.71  | 4.71  | 2.60  | 3.76  |
|-------------|-------|-------|-------|-------|
| MCH         | 31    | 32    | 32    | 32    |
|             | 31    | 30    | 30    | 30    |
|             | 26    | 26    | 27    | 27    |
|             | 33    | 33    | 33    | 33    |
|             | 31    | 32    | 32    | 32    |
|             | 31    | 31    | 31    | 31    |
|             | 30    | 30    | 31    | 30    |
|             | 31    | 31    | 31    | 32    |
|             | 28    | 28    | 28    | 28    |
|             | 31    | 31    | 31    | 31    |
| MCV         | 87    | 85    | 86    | 87    |
|             | 85    | 85    | 85    | 85    |
|             | 79    | 78    | 79    | 78    |
|             | 93    | 91    | 91    | 92    |
|             | 91    | 89    | 90    | 90    |
|             | 86    | 84    | 84    | 85    |
|             | 86    | 86    | 86    | 87    |
|             | 87    | 86    | 86    | 86    |
|             | 83    | 81    | 82    | 82    |
|             | 88    | 87    | 88    | 89    |
| MCHC        | 36    | 37    | 37    | 37    |
|             | 36    | 35    | 35    | 36    |
|             | 33    | 34    | 34    | 34    |
|             | 36    | 36    | 36    | 36    |
|             | 34    | 35    | 35    | 35    |
|             | 36    | 37    | 36    | 36    |
|             | 35    | 35    | 36    | 35    |
|             | 36    | 36    | 36    | 37    |
|             | 34    | 35    | 35    | 34    |
|             | 35    | 35    | 35    | 35    |
| Monocytes % | 7.20  | 8.20  | 5.90  | 5.80  |
|             | 7.30  | 6.90  | 6.60  | 4.80  |
|             | 6.20  | 6.60  | 6.70  | 5.40  |
|             | 6.80  | 6.00  | 5.40  | 6.80  |
|             | 10.50 | 14.30 | 11.00 | 10.80 |
|             | 7.30  | 7.80  | 6.70  | 5.90  |
|             | 13.10 | 12.00 | 7.60  | 7.60  |
|             | 7.90  | 6.80  | 7.90  | 8.70  |

|                 |       |       |       |       |
|-----------------|-------|-------|-------|-------|
|                 | 4.00  | 4.50  | 4.00  | 5.20  |
|                 | 5.50  | 5.70  | 5.20  | 5.20  |
| Monocytes abs   | 0.39  | 0.70  | 0.39  | 0.60  |
|                 | 0.38  | 0.58  | 0.33  | 0.32  |
|                 | 0.29  | 0.42  | 0.28  | 0.28  |
|                 | 0.41  | 0.45  | 0.25  | 0.36  |
|                 | 0.41  | 0.68  | 0.37  | 0.55  |
|                 | 0.32  | 0.52  | 0.26  | 0.41  |
|                 | 0.61  | 0.59  | 0.44  | 0.57  |
|                 | 0.43  | 0.59  | 0.33  | 0.54  |
|                 | 0.31  | 0.43  | 0.26  | 0.45  |
|                 | 0.42  | 0.51  | 0.30  | 0.37  |
| MPV             | 9.40  | 9.70  | 9.50  | 9.70  |
|                 | 10.80 | 11.10 | 11.00 | 11.00 |
|                 | 10.40 | 10.50 | 10.60 | 10.40 |
|                 | 10.20 | 10.00 | 10.00 | 10.10 |
|                 | 10.40 | 10.50 | 10.60 | 10.70 |
|                 | 10.10 | 10.20 | 10.60 | 10.10 |
|                 | 10.20 | 10.30 | 10.40 | 10.60 |
|                 | 11.50 | 11.20 | 11.10 | 11.60 |
|                 | 9.20  | 8.90  | 9.00  | 9.20  |
|                 | 12.10 | 12.10 | 12.20 | 12.00 |
| Neutrophile %   | 46.20 | 47.10 | 71.20 | 67.90 |
|                 | 47.30 | 39.70 | 54.40 | 59.40 |
|                 | 53.50 | 46.80 | 56.10 | 60.10 |
|                 | 49.10 | 43.30 | 50.70 | 44.80 |
|                 | 42.70 | 42.30 | 50.70 | 62.30 |
|                 | 61.00 | 50.90 | 65.60 | 70.40 |
|                 | 44.30 | 46.40 | 74.40 | 74.20 |
|                 | 50.40 | 39.20 | 54.40 | 56.90 |
|                 | 63.60 | 54.80 | 59.50 | 57.20 |
|                 | 43.80 | 39.90 | 47.70 | 40.10 |
| Neutrophile abs | 2.49  | 4.05  | 4.73  | 7.08  |
|                 | 2.48  | 3.33  | 2.70  | 3.92  |
|                 | 2.49  | 2.97  | 2.36  | 3.12  |
|                 | 2.96  | 3.26  | 2.35  | 2.38  |
|                 | 1.66  | 2.01  | 1.71  | 3.19  |
|                 | 2.68  | 3.38  | 2.53  | 4.89  |
|                 | 2.07  | 2.28  | 4.31  | 5.59  |
|                 | 2.76  | 3.41  | 2.26  | 3.54  |

|                   |       |       |       |       |
|-------------------|-------|-------|-------|-------|
|                   | 4.90  | 5.29  | 3.88  | 4.95  |
|                   | 3.36  | 3.60  | 2.77  | 2.88  |
| RPI               | 0.90  | 1.00  | 0.90  | 0.80  |
|                   | 1.30  | 1.20  | 1.30  | 1.20  |
|                   | 0.70  | 0.60  | 0.60  | 0.60  |
|                   | 1.40  | 1.40  | 1.30  | 1.30  |
|                   | 0.60  | 0.70  | 0.60  | 0.60  |
|                   | 1.60  | 1.50  | 1.30  |       |
|                   | 0.90  | 0.90  | 0.80  | 0.80  |
|                   | 1.10  | 1.20  | 1.00  | 1.10  |
|                   | 0.70  | 0.70  | 0.40  | 0.70  |
|                   | 1.90  | 1.80  | 1.70  | 1.70  |
| Reticulocytes %   | 0.98  | 1.05  | 1.04  | 0.89  |
|                   | 1.39  | 1.27  | 1.39  | 1.24  |
|                   | 0.70  | 0.68  | 0.73  | 0.70  |
|                   | 1.55  | 1.54  | 1.49  | 1.51  |
|                   | 0.70  | 0.81  | 0.79  | 0.69  |
|                   | 1.63  | 1.49  | 1.44  | 1.51  |
|                   | 0.91  | 0.92  | 0.83  | 0.79  |
|                   | 1.28  | 1.37  | 1.24  | 1.28  |
|                   | 0.86  | 0.88  | 0.84  | 0.80  |
|                   | 2.26  | 2.22  | 2.15  | 2.10  |
| Reticulocytes abs | 45.60 | 50.50 | 48.50 | 41.20 |
|                   | 69.80 | 65.40 | 69.20 | 62.00 |
|                   | 37.90 | 34.70 | 36.30 | 34.30 |
|                   | 67.10 | 68.10 | 62.10 | 64.20 |
|                   | 29.00 | 34.90 | 32.70 | 28.40 |
|                   | 82.60 | 80.00 | 72.70 | 82.70 |
|                   | 47.70 | 46.80 | 40.90 | 41.20 |
|                   | 58.80 | 62.20 | 53.80 | 57.20 |
|                   | 40.10 | 38.80 | 36.40 | 35.70 |
|                   | 95.80 | 93.00 | 87.10 | 86.30 |
| Ret-Hemoglobin    | 33.90 | 34.40 | 34.10 | 33.90 |
|                   | 32.20 | 31.90 | 32.40 | 32.00 |
|                   | 28.90 | 28.30 | 28.90 | 28.60 |
|                   | 34.70 | 35.10 | 34.80 | 34.30 |
|                   | 32.70 | 33.30 | 33.00 | 32.50 |
|                   | 33.50 | 33.40 | 33.20 | 33.10 |
|                   | 33.00 | 32.40 | 32.50 | 32.30 |

|       |       |       |       |
|-------|-------|-------|-------|
| 33.40 | 33.30 | 33.10 | 33.60 |
| 30.20 | 30.80 | 30.60 | 30.10 |
| 33.10 | 33.50 | 33.30 | 33.00 |

Thrombocytes

|     |     |     |     |
|-----|-----|-----|-----|
| 305 | 342 | 304 | 343 |
| 173 | 197 | 178 | 192 |
| 185 | 186 | 168 | 180 |
| 207 | 212 | 194 | 207 |
| 240 | 255 | 250 | 245 |
| 218 | 246 | 206 | 253 |
| 248 | 238 | 215 | 258 |
| 189 | 188 | 166 | 179 |
| 226 | 217 | 201 | 224 |
| 223 | 204 | 188 | 203 |
